# Supplementary material
Source: publisher figshare collection journal article supplement (https://tandf.figshare.com/ndownloader/files/17853479)
Supplement: Supplementary file 1 [file 17853479]

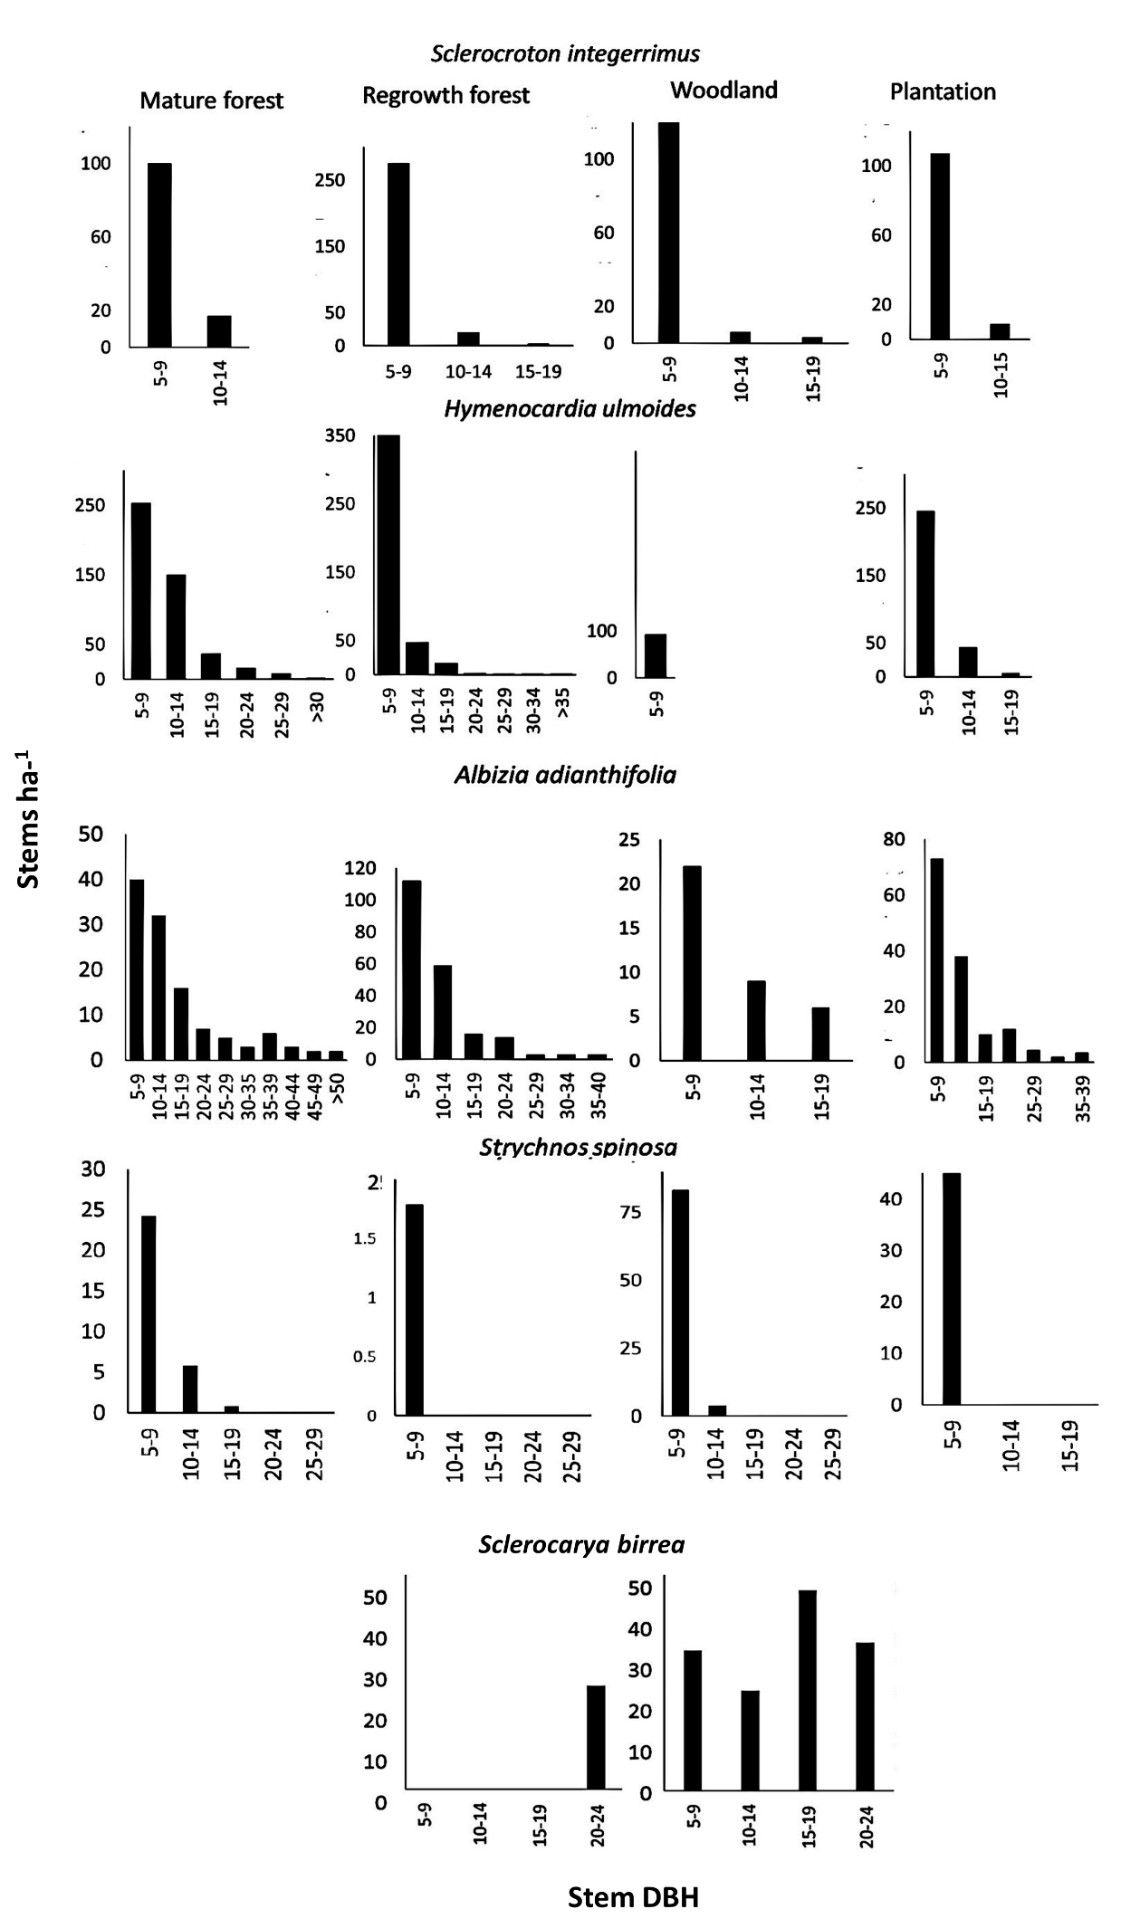


Appendix 1. Stem class distributions (at 5cm increments) of commonly occurring species across the four vegetation types.
